# Supplementary material
Source: HighWire-hosted journal article supplement (https://bmjopen.bmj.com/content/12/4/e059068)
Supplement: inline-supplementary-material-1 [file inline-supplementary-material-1.pdf]

Supplementary Table 1. Sample characteristics.

|                                    | Smoking                                               |                                   | E-cigarettes or HTP                                   |                                 |
|------------------------------------|-------------------------------------------------------|-----------------------------------|-------------------------------------------------------|---------------------------------|
|                                    | Have attempted or succeeded to quit<br>N (weighted %) | Current smokers<br>N (weighted %) | Have attempted or succeeded to quit<br>N (weighted %) | Current users<br>N (weighted %) |
| Age                                |                                                       |                                   |                                                       |                                 |
| 15-24 years                        | 410 (5.4)                                             | 560 (10.7)                        | 141 (13.9)                                            | 40 (19.8)                       |
| 25-39 years                        | 1,862 (21.2)                                          | 1,819 (2.3)                       | 357 (36.5)                                            | 89 (30.3)                       |
| 40-54 years                        | 2,595 (27.2)                                          | 2,046 (29.3)                      | 316 (29.3)                                            | 76 (24.8)                       |
| 55+ years                          | 5,020 (46.3)                                          | 2,236 (30.7)                      | 289 (20.3)                                            | 78 (25.0)                       |
| Sex                                |                                                       |                                   |                                                       |                                 |
| Female                             | 4,462 (44.7)                                          | 3,067 (45.1)                      | 502 (43.5)                                            | 123 (41.8)                      |
| Male                               | 5,427 (55.3)                                          | 3,594 (54.9)                      | 601 (56.5)                                            | 161 (58.2)                      |
| Difficulty paying bills            |                                                       |                                   |                                                       |                                 |
| Never/almost never                 | 6,954 (69.6)                                          | 3,759 (57.5)                      | 673 (57.1)                                            | 188 (70.8)                      |
| From time to time/most of the time | 2,883 (30.4)                                          | 2,852 (42.5)                      | 422 (42.9)                                            | 94 (29.2)                       |
| Education                          |                                                       |                                   |                                                       |                                 |
| Lower secondary or lower           | 2,069 (28.3)                                          | 1,567 (29.5)                      | 213 (28.5)                                            | 47 (25.7)                       |
| Upper secondary                    | 4,116 (36.4)                                          | 3,436 (44.8)                      | 500 (38.5)                                            | 108 (38.0)                      |
| Tertiary up to bachelor            | 2,292 (21.2)                                          | 1,088 (16.5)                      | 274 (22.4)                                            | 95 (23.8)                       |
| Masters or above                   | 1,409 (14.1)                                          | 566 (9.3)                         | 116 (10.6)                                            | 34 (12.4)                       |
| Area of residence                  |                                                       |                                   |                                                       |                                 |
| Rural                              | 3,151 (28.8)                                          | 2,097 (27.4)                      | 292 (23.7)                                            | 73 (24.4)                       |
| Urban                              | 6,734 (71.2)                                          | 4,560 (72.6)                      | 811 (76.3)                                            | 211 (75.6)                      |
| Smoking                            |                                                       |                                   |                                                       |                                 |
| Never smoker                       | -                                                     | -                                 | 61 (6.3)                                              | 42 (21.5)                       |
| Current smoker                     | 3,368 (35.0)                                          | 6,661 (100.0)                     | 601 (56.8)                                            | -                               |
| Former smoker                      | 6,521 (65.0)                                          | -                                 | 440 (36.9)                                            | 242 (78.5)                      |
| <b>Total</b>                       | <b>9,889 (100)</b>                                    | <b>6,661 (100)</b>                | <b>1,103 (100)</b>                                    | <b>284 (100)</b>                |

**Supplementary table 2. Regression models characteristics**

| Outcome                                            | Number of observations | Number of groups | Average number of observations per group | Akaike's Information Criterion (AIC) | Bayesian Information Criterion (BIC) |
|----------------------------------------------------|------------------------|------------------|------------------------------------------|--------------------------------------|--------------------------------------|
| Attempted to quit smoking                          | 6604                   | 28               | 235.9                                    | 8395.09                              | 8469.84                              |
| Attempted to quit e-cigarette or HTP               | 283                    | 28               | 10.4                                     | 310.23                               | 350.25                               |
| Used pharmacotherapy to quit e-cigarettes or HTP   | 1095                   | 28               | 39.1                                     | 769.36                               | 824.34                               |
| Used e-cigarettes to quit HTP                      | 1057                   | 28               | 37.5                                     | 1046.71                              | 1101.24                              |
| Used HTP to quit e-cigarettes                      | 1043                   | 28               | 37.3                                     | 422.58                               | 477.03                               |
| Used smokeless tobacco to quit e-cigarettes or HTP | 1095                   | 28               | 39.1                                     | 301.23                               | 356.21                               |
| Used medical support to quit e-cigarettes or HTP   | 1095                   | 28               | 39.1                                     | 515.70                               | 570.68                               |
| Used no aid to quit e-cigarettes or HTP            | 1095                   | 28               | 39.1                                     | 1471.98                              | 1526.97                              |
| Used any aid to quit e-cigarettes or HTP           | 1095                   | 28               | 39.1                                     | 1473.39                              | 1528.37                              |
| Used pharmacotherapy to quit smoking               | 9828                   | 28               | 351.0                                    | 7298.57                              | 7377.69                              |
| Used e-cigarettes to quit smoking                  | 9828                   | 28               | 351.0                                    | 5278.85                              | 5357.97                              |
| Used HTP to quit smoking                           | 9828                   | 28               | 351.0                                    | 1923.69                              | 2002.81                              |
| Used smokeless tobacco to quit smoking             | 9828                   | 28               | 351.0                                    | 1440.92                              | 1520.05                              |
| Used medical support to quit smoking               | 9828                   | 28               | 351.0                                    | 4107.60                              | 4186.72                              |
| Used no aid to quit smoking                        | 9828                   | 28               | 351.0                                    | 10086.68                             | 10165.80                             |
| Used any aid to quit smoking                       | 9828                   | 28               | 351.0                                    | 10895.56                             | 10974.69                             |
